RESEARCH ARTICLE

# Application of the 3D slicer chest imaging platform segmentation algorithm for large lung nodule delineation

Stephen S. F. Yip<sup>1\*</sup>, Chintan Parmar<sup>1</sup>, Daniel Blezek<sup>2</sup>, Raul San Jose Estepar<sup>3</sup>, Steve Pieper<sup>4</sup>, John Kim<sup>5</sup>, Hugo J. W. L. Aerts<sup>1,3</sup>

**1** Department of Radiation Oncology, Dana-Farber Cancer Institute, Brigham and Women's Hospital, and Harvard Medical School, Boston, MA, United States of America, **2** Biomedical Engineering Department, Mayo Graduate School of Medicine Rochester, MN, United States of America, **3** Department of Radiology, Brigham and Women's Hospital and Harvard Medical School, Boston, MA, United States of America, **4** Isomics, Inc., Cambridge, MA, United States of America, **5** Department of Radiology, University of Michigan Health System, Ann Arbor MI, United States of America

\* [Stephen\\_Yip@dfci.harvard.edu](mailto:Stephen_Yip@dfci.harvard.edu)

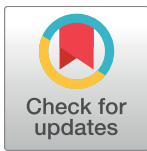

**OPEN ACCESS**

**Citation:** Yip SSF, Parmar C, Blezek D, Estepar RSJ, Pieper S, Kim J, et al. (2017) Application of the 3D slicer chest imaging platform segmentation algorithm for large lung nodule delineation. PLoS ONE 12(6): e0178944. <https://doi.org/10.1371/journal.pone.0178944>

**Editor:** Peter M.A. van Ooijen, University of Groningen, University Medical Center Groningen, NETHERLANDS

**Received:** February 13, 2017

**Accepted:** May 22, 2017

**Published:** June 8, 2017

**Copyright:** © 2017 Yip et al. This is an open access article distributed under the terms of the [Creative Commons Attribution License](https://creativecommons.org/licenses/by/4.0/), which permits unrestricted use, distribution, and reproduction in any medium, provided the original author and source are credited.

**Data Availability Statement:** Since a publicly available dataset was used in this study, approval by an institutional review board was not needed. A publicly available thoracic CT dataset, known as the Lung Image Database Consortium (LIDC), was downloaded from The Cancer Imaging Archive (TCIA: <https://wiki.cancerimagingarchive.net/display/Public/LIDC-IDRI/>).

**Funding:** The authors would like to acknowledge support from the National Institutes of Health

## Abstract

### Purpose

Accurate segmentation of lung nodules is crucial in the development of imaging biomarkers for predicting malignancy of the nodules. Manual segmentation is time consuming and affected by inter-observer variability. We evaluated the robustness and accuracy of a publicly available semiautomatic segmentation algorithm that is implemented in the 3D Slicer Chest Imaging Platform (CIP) and compared it with the performance of manual segmentation.

### Methods

CT images of 354 manually segmented nodules were downloaded from the LIDC database. Four radiologists performed the manual segmentation and assessed various nodule characteristics. The semiautomatic CIP segmentation was initialized using the centroid of the manual segmentations, thereby generating four contours for each nodule. The robustness of both segmentation methods was assessed using the region of uncertainty ( $\delta$ ) and Dice similarity index (DSI). The robustness of the segmentation methods was compared using the Wilcoxon-signed rank test ( $p_{\text{Wilcoxon}} < 0.05$ ). The Dice similarity index ( $DSI_{\text{Agree}}$ ) between the manual and CIP segmentations was computed to estimate the accuracy of the semiautomatic contours.

### Results

The median computational time of the CIP segmentation was 10 s. The median CIP and manually segmented volumes were 477 ml and 309 ml, respectively. CIP segmentations were significantly more robust than manual segmentations (median  $\delta_{\text{CIP}} = 14\text{ml}$ , median  $dsi_{\text{CIP}} = 99\%$  vs. median  $\delta_{\text{manual}} = 222\text{ml}$ , median  $dsi_{\text{manual}} = 82\%$ ) with  $p_{\text{Wilcoxon}} \sim 10^{-16}$ . The agreement between CIP and manual segmentations had a median  $DSI_{\text{Agree}}$  of 60%. While

(award number U01CA190234 and U24CA194354) and research seed funding grant from the American Association of Physicists in Medicine. The Chest Imaging Platform (CIP) is supported by the National Institutes of Health award number 1R01HL116931. Isomics, Inc. provided support in the form of salaries for author SP, but did not have any additional role in the study design, data collection and analysis, decision to publish, or preparation of the manuscript. The specific role of this author is articulated in the 'author contributions' section.

**Competing interests:** Dr. Steve Pieper is the owner and an employee of Isomics, Inc., but Isomics, Inc. is not a funder of this study. There are no patents, products in development or marketed products to declare. This does not alter our adherence to all the PLOS ONE policies on sharing data and materials, as detailed online in the guide for authors.

13% (47/354) of the nodules did not require any manual adjustment, minor to substantial manual adjustments were needed for 87% (305/354) of the nodules. CIP segmentations were observed to perform poorly (median  $DSI_{Agree} \approx 50\%$ ) for non-/sub-solid nodules with subtle appearances and poorly defined boundaries.

## Conclusion

Semi-automatic CIP segmentation can potentially reduce the physician workload for 13% of nodules owing to its computational efficiency and superior stability compared to manual segmentation. Although manual adjustment is needed for many cases, CIP segmentation provides a preliminary contour for physicians as a starting point.

## Introduction

Quantitative imaging has become an important area of research for the development of non-invasive imaging biomarkers for numerous applications, such as the prediction of clinical outcomes, and assessment of treatment response and gene expression [1, 2]. In particular, quantitative imaging has the potential to have an immense impact on lung cancer patients. Lung cancer is a leading cause of cancer-related death among men and women, affecting over 1.8 million patients worldwide [3]. At the time of diagnosis, the majority of patients are in advanced stages of disease, resulting in poor prognoses with a 5-year overall survival rate of  $< 20\%$  [4]. However, patients who are treated for early stage disease have a substantially greater overall survival rate of  $> 50\%$  [4]. Therefore, identification of patients with early stage disease is crucial for improving prognosis of lung cancer patients [5].

Computed tomography (CT) is routinely used to diagnose and monitor disease progression in lung cancer patients, where early stage disease is often manifested as pulmonary nodules [6, 7]. One of the challenges of identifying patients with early stage lung cancer is that these pulmonary nodules may also be an indicator of other benign conditions, such as inflammation and/or infection, rather than malignancy [8]. Studies have hypothesized that malignant nodules possess distinctive CT imaging features from benign nodules, such as greater lesion volume, longer diameter and faster growth rate [9–14]. Classifiers that are built using imaging features have shown promise in assisting physicians to effectively identify different nodule types [15–20]. The development and accuracy of these classifiers relies on accurate delineation of the region of interest that conforms only to the nodule boundaries. Quantitative imaging features are then extracted and evaluated from this region of interest to generate the classifier. Therefore, inaccurate segmentation of tumors can lead to the development of inaccurate classifiers or biomarkers. Manual segmentation by experienced radiologists is commonly used for defining the nodule volume (or region of interest) using a slice-by-slice approach. However, manual segmentation is not only labor intensive, but is also impacted by inter- and intra-observer variability [21–24]. A number of automatic and semiautomatic segmentation methods have been proposed, ranging from simple approaches, such as thresholding [25] and region growing [26], to more complex methods based on the probability map of nodule textures and convexity [17, 27, 28]. Despite having great potential to reduce human errors and expedite the nodule contouring workflow, these methods are currently not publically accessible, which limits their widespread use in clinical and biomedical research.

Alternatively, 3D Slicer is an open-source software platform for biomedical research [29] that supports versatile visualization and provides advanced analysis tools, such as image

segmentation and registration. An algorithm implemented in 3D Slicer, known as GrowCut, can delineate large lung tumor volumes more robustly than manual segmentation [30], and reliably extract imaging features for the development of imaging biomarkers [31]. However, segmentation of pulmonary nodules presents a unique challenge since the nodules are often smaller and in close proximity with surrounding tissues. Therefore, additional pruning steps are required in the nodule segmentation process to remove pleural and/or vessel attachments [32, 33]. To address these challenges with nodule segmentation, a level set-based algorithm has been implemented within the Chest Imaging Platform (CIP) in 3D Slicer [33, 34]. This algorithm is based on a front propagation approach from a “seed point” placed within the nodule. The propagation of the front (or segmentation) is constrained to prevent leakage into the chest wall, airway walls or regions with appearance of tubular or vessel-like structures.

This study investigated the ability of CIP segmentation to assist physicians with nodule segmentation. In particular, we evaluated the robustness of the CIP segmentation algorithm in delineating lung nodules and compared its performance with the manual segmentations. The accuracy of the CIP segmentation algorithm and nodule characteristics that could affect the segmentation quality was also investigated.

### Materials and methods

**Patient dataset:** Since a publicly available dataset was used in this study, approval by an institutional review board was not needed. A publicly available thoracic CT dataset, known as the Lung Image Database Consortium (LIDC), was downloaded from The Cancer Imaging Archive (TCIA: <https://wiki.cancerimagingarchive.net/display/Public/LIDC-IDRI/>) [23]. The LIDC dataset consisted of 1007 patients with low dose helical thoracic CT images containing annotated lung nodules that were acquired from seven academic institutions with slice thicknesses ranging from 1 mm to 5 mm. In the LIDC dataset, each nodule had 1 to 4 manual segmentations that were performed on a slice-by-slice basis by experienced thoracic radiologists. The LIDC radiologists assigned scores (ranging from 1 to 5) to each nodule for nine categories that described the nodule characteristics, including its subtlety, internal structure, roundness, margin sharpness, lobulation, spiculation, texture, and likelihood of being malignant. Table 1 contains an annotation of the scoring system. Images were excluded from the current study if they were not segmented by 4 or more radiologists (n = 596), nodule numbers were mislabeled (n = 60) or had imaging artifacts (n = 77, Fig A in S1 File). The imaging artifacts were due to

**Table 1. Annotation of nodule characteristic scoring.**

|                               | 1                              | 2                   | 3                | 4                     | 5                 | 6      |
|-------------------------------|--------------------------------|---------------------|------------------|-----------------------|-------------------|--------|
| <b>Nodule Characteristics</b> |                                |                     |                  |                       |                   |        |
| Subtlety                      | Extremely Subtle               | Moderately Subtle   | Fairly Subtle    | Moderately Obvious    | Obvious           | N/A    |
| Internal Structure            | Soft Tissue (default)          | Fluid               | Fat              | Air                   | N/A               | N/A    |
| Calcification                 | Popcorn                        | Laminated           | Solid            | Non-Central           | Central           | Absent |
| Sphericity (Roundness)        | Linear                         |                     | Ovoid            |                       | Round             |        |
| Margin                        | Poorly                         |                     |                  |                       | Sharp             | N/A    |
| Lobulation                    | None                           |                     |                  |                       | Marked            | N/A    |
| Spiculation                   | None                           |                     |                  |                       | Marked            | N/A    |
| Texture                       | Non-Solid/Ground Glass Opacity |                     | Part Solid/Mixed |                       | Solid             | N/A    |
| Malignancy                    | Highly unlikely                | Moderately unlikely | Indeterminate    | Moderately suspicious | Highly suspicious | N/A    |

The intermediate values for Roundness, Margin, Lobulation, Spiculation, and Texture are allowed to use by the radiologists. N/A = not applicable.

<https://doi.org/10.1371/journal.pone.0178944.t001>

corruption in the original LIDC DICOM files. As a result, images from 274 patients with 354 nodules (1–4 nodules/patient) were used to analyze the robustness and accuracy of 3D Slicer CIP-segmentation.

Nodule segmentation algorithm in 3D Slicer: The CIP in 3D Slicer 4.5 [29] employs semiautomatic nodule segmentation algorithm based on the open-source a Lesion Sizing Toolkit-based [33]. A seed point is placed within the nodule region to initialize the segmentation. In this current study, the seed point was chosen as the centroid of each manual contour. As there were four radiologist-defined nodule contours, four CIP-segmentations were generated automatically for each nodule. To speed up the computation time, the CIP segmentation algorithm also automatically cropped the CT images around the seed points with a radius of 30 mm. If an image consisted of multiple nodules, then an automatically cropped region was created around the seed point for each nodule.

Within each cropped region, the nodule segmentation was based on a level set formulation (Sethian 1999) to propagate a front according to a Geodesic Active Contour functional [35]. The contour propagation is governed by a smoothing term that minimizes the curvature of the contour and an “attachment” term that pulls the front towards the features of interest. This second term employs a speed map,  $F$ , to guide the segmentation results according to the desired characteristics of nodules. The speed map is obtained as a sigmoid transformed min pooling of four different feature maps that are designed to slow down the evolution in 1) the chest wall region, 2) vascular structures, 3) the interface between the nodule and the lung parenchyma, and 4) areas whose density is not compatible with nodular structures. The chest wall feature map was obtained according to a threshold-based approach followed by morphological operations similar to the ones employed in standard lung segmentation approaches [36]. Vessel-like structures were penalized based on the Sato vesselness filter [37]. The interface map between the nodule and the lung parenchyma is defined according to a canny edge detector. Finally, the non-nodular regions were excluded based on a sigmoid function with parameters,  $\alpha = 100$  and  $\beta = -200$  and  $-500$  for solid and non-solid nodules respectively. One or more seed points within the nodule initialize the segmentation.

Robustness of the segmentation methods: The region of uncertainty ( $\delta$ ) and dice similarity index (DSI), were used to assess the robustness of the manual and CIP segmentations. The region of uncertainty was defined as the negation of the intersect regions of all the segmentations (Fig 1). In particular, the region of uncertainty ( $\delta$ ) was defined as follow:

$$\delta_{method} = (V_{method}^I \cup V_{method}^{II} \cup V_{method}^{III} \cup V_{method}^{IV}) - (V_{method}^I \cap V_{method}^{II} \cap V_{method}^{III} \cap V_{method}^{IV}) \quad (1)$$

Where *method* could either be manual or CIP segmentation. For manual segmentation, the superscript indicates the nodule volume delineated by the four different radiologists, whereas for CIP segmentation, it indicates the segmentations initialized by the centroid computed from the four radiologist-defined volumes.  $\delta$  equaled to zero indicated that the segmentation method was perfectly robust across the four segmentations. The stability of the segmentation method decreases with increasing in the  $\delta_{method}$  (Fig 2).

The DSI for segmentation stability was defined as follow:

$$dsi_{method} = \frac{1}{6} \sum_{i \neq j} \frac{n(V_{method}^i \cap V_{method}^j)}{\frac{n(V_{method}^i) + n(V_{method}^j)}{2}} \cdot 100\% \quad (2)$$

Where *method* could either be manual or CIP segmentation.  $n(V)$  indicates the number of voxel in volume  $V$ .  $i$  and  $j$  ranged from 1 to 4 indicating nodule volumes segmented by radiologist  $i$  and  $j$ , or initialized by the centroid computed from radiologist  $i$  and  $j$ , for manual and CIP segmentations, respectively. There were four contours for each segmentation method and,

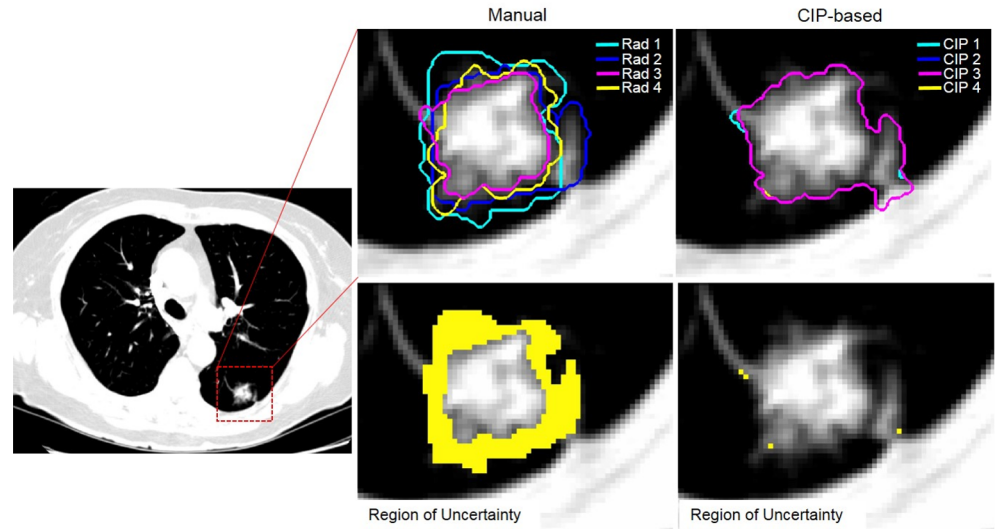

**Fig 1. Comparison of manual (left) and CIP-based (right) segmentation.** Yellow shaded region indicated the disagreement (or region of uncertainty) between contours performed by four radiologists (bottom left) or different CIP-based seed locations (bottom right). In this example, the region of uncertainty for manual segmentation was 3222 ml while the region was only 46 ml for the CIP-based segmentation.  $dsi_{CIP}$  was  $\approx 100\%$ , while  $dsi_{manual}$  was 88%.

<https://doi.org/10.1371/journal.pone.0178944.g001>

thus, six possible combinations of  $i$  and  $j$ . The stability of the segmentation method increases with increasing  $dsi_{method}$ , where  $dsi_{method} = 100\%$  indicates a perfectly robust method.

The robustness of the CIP segmentation method ( $\delta_{CIP}$  or  $dsi_{CIP}$ ) was compared with the manual segmentation method ( $\delta_{manual}$  or  $dsi_{manual}$ ) using the Wilcoxon signed-rank test,

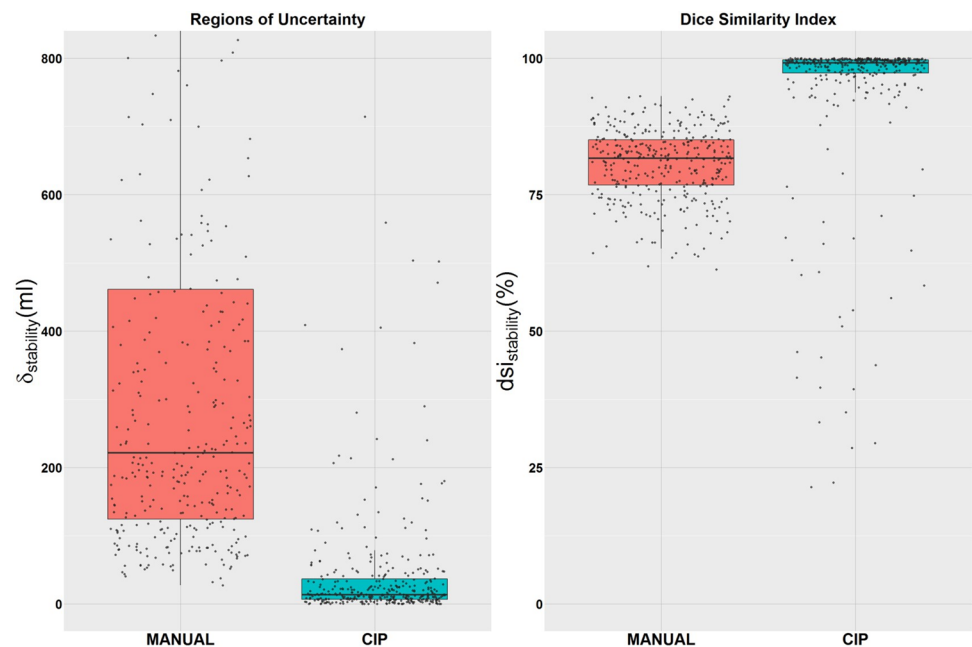

**Fig 2. Robustness (or stability) of the manual and CIP-based segmentation.** The robustness of the manual and CIP-based segmentation assessed with the region of uncertainty ( $\delta$ ) and Dice similarity index (dsi).

<https://doi.org/10.1371/journal.pone.0178944.g002>

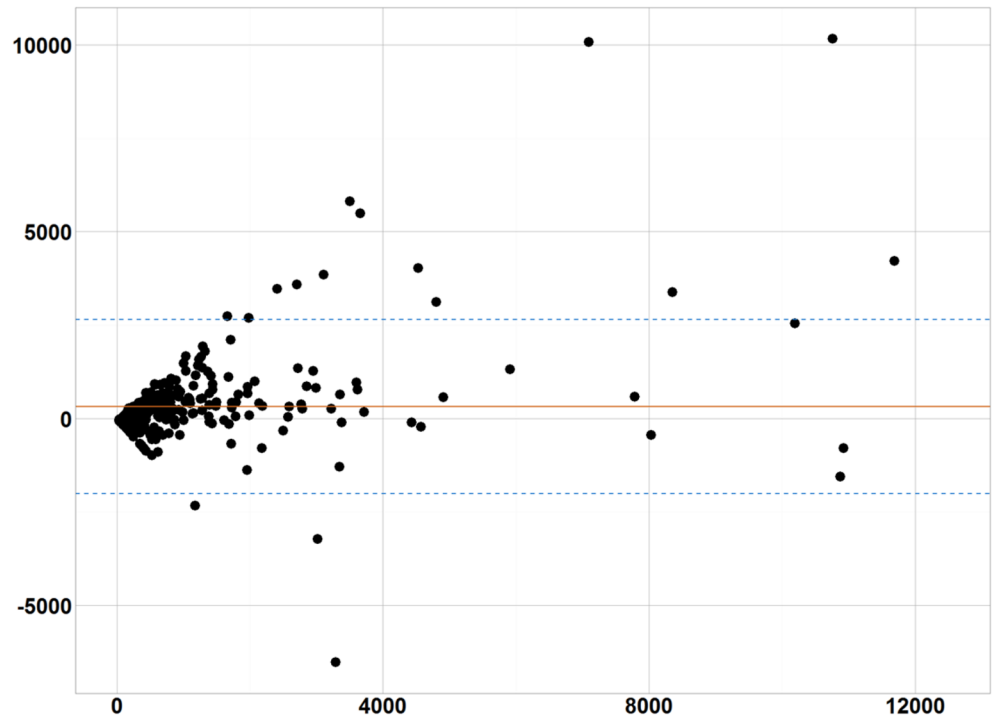

**Fig 3. Bland-Altman plots.** Bland-Altman plots highlights the differences between  $\overline{V_{CIP}}$  and  $\overline{V_{manual}}$  for all nodules. The 95% interval of the differences are depicted by the blue dotted lines. Solid red line is the average difference between  $\overline{V_{CIP}}$  and  $\overline{V_{manual}}$  (= 318ml).

<https://doi.org/10.1371/journal.pone.0178944.g003>

where  $p_{Wilcoxon} < 0.05$  indicated statistical significance. Moreover, the average nodule volume segmented by the manual and CIP contouring methods were also compared and tested for significant differences. The average nodule volume was defined as  $\overline{V_{method}} = \frac{1}{4} \sum_{i=1}^4 V_{method}^i$ ; where  $i$  indicates radiologist  $i$ . Since the ground truth of the nodule segmentation is unknown, the average nodule volume ( $\overline{V_{manual}}$ ) computed from the manual contours was used to estimate the true nodule volume. Unless otherwise specified,  $\overline{V_{manual}}$  is referred to as nodule volume.

Accuracy of the CIP segmentation method: The accuracy of CIP segmentations was evaluated to ensure that non-nodular tissues were excluded and the entire nodule volume was contoured. Even if the CIP segmentation was perfectly robust, it may include nearby non-nodule tissues or fail to capture the entire nodule region. For example, despite being almost perfectly robust, nodules contoured by the CIP segmentation method were observed to include substantial normal lung regions as shown in Figs 3B and 4A. The agreement between the manual and CIP segmentations was used to estimate how well the nodule volume could be delineated by the CIP segmentation.  $DSI_{Agree}$  was used to assess for the segmentation agreement and was defined as follow:

$$DSI_{Agree} = \frac{1}{4} \sum_{i=1}^4 \frac{n(V_{CIP}^i \cap V_j)}{\frac{n(V_{CIP}^i) + n(V_j)}{2}} \cdot 100\% \tag{3}$$

Where  $V_{CIP}^i$  is the CIP segmentation nodule volume initialized by the centroid of nodule volume segmented by radiologist  $i$ .  $V_j$  could either be the intersection ( $j = 1$ ) or the union ( $j = 2$ ) of the radiologist defined segmentations.

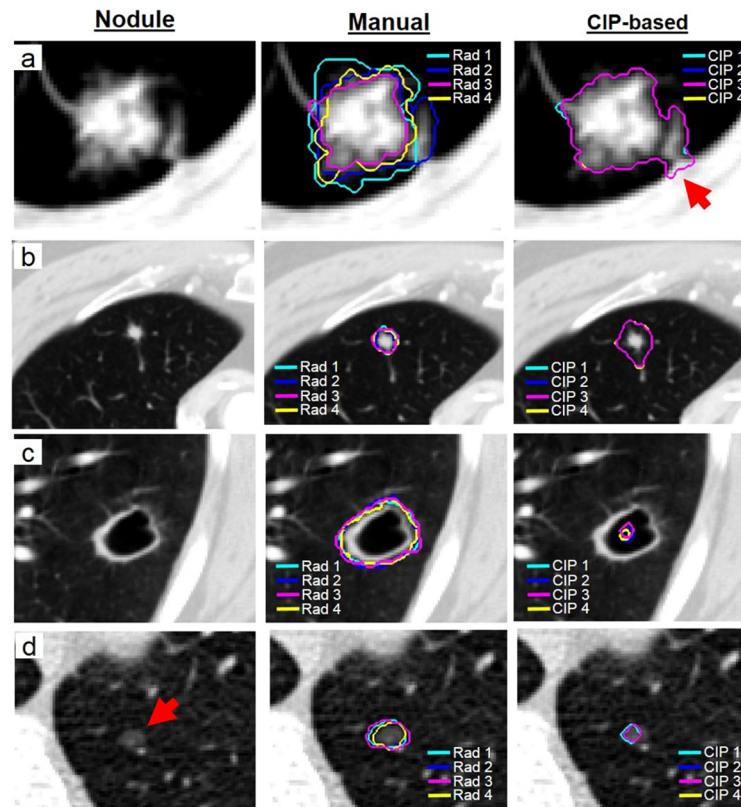

**Fig 4. Examples of nodules that were segmented by radiologists manually and CIP segmentations. a)** The robustness of the CIP segmentation was excellent, while substantial interobserver variability was observed in manual segmentation. CIP segmentation was also in excellent agreement with manual contours. However, CIP segmentation was observed to include part of the chest wall (indicated by an arrow) b) Despite being perfectly robust CIP segmentation, it included the region of the normal lung in proximity of the small nodule. c) Cavitation in the center of the nodule. Poor CIP segmentation performance was found. d) Non-solid (ground glass opacity) nodule with poorly defined boundary and subtle appearance is indicated by the red arrow. Poor CIP segmentation performance was found.

<https://doi.org/10.1371/journal.pone.0178944.g004>

To avoid confusion, lower case dsi was used to indicate the robustness of the segmentation method while upper case DSI was used to indicate the accuracy of the CIP-based segmentation in this paper.

Moreover, all the CIP-segmentations were visually inspected by an experienced radiologist (J.K.) and researcher (S.Y.). They then classified the nodule segmentations into four categories: 1) substantial, 2) moderate, 3) minor, and 4) no manual adjustment required.

Relationship between nodule characteristics and CIP segmentation accuracy: To identify nodule characteristics that may affect the accuracy of the CIP segmentation, the Spearman's correlation coefficient was computed between the radiologists scored nodule characteristics and  $DSI_{Agree}$ . For nodule characteristics that had a continuous scoring scale (e.g. margin ranges from 1 to 5, where 1 indicates a poorly defined margin and 5 indicates a sharp margin) (Table 1), a t-test was used to assess if the correlation coefficient was significantly different from 0 ( $p_{t-test} < 0.05$ ). For characteristic categories where the scoring scale was categorical (ordinal) rather than continuous (i.e. nodule calcification where each score indicates a different appearance) (Table 1), the Kruskal-Wallis test ( $p_{Kruskal-Wallis} < 0.05$ ) was used.

The correlations between  $\overline{V}_{manual}$ ,  $DSI_{Agree}$  and all nodule characteristics were also calculated. Four radiologists scored each category, and thus, there was some variability in the

characteristic scoring. When there was a heterogeneous rating, the score that was assigned by the majority of radiologists was chosen for the analysis. In the case of a tie rating, the score that were most frequently assigned to the patient population was chosen. The distributions of the scores for each nodule characteristic are shown in Fig B in [S1 File](#).

Furthermore, Spearman's correlation coefficient was employed between image voxel thickness and  $DSI_{Agree}$  to investigate if the voxel thickness affected the segmentation quality. The significance of the relationship was assessed by a t-test ( $p_{t-test} < 0.05$ ).

## Results

In this study, a semiautomatic segmentation method implemented in the CIP of 3D Slicer was used to contour 354 nodules. The computation time of the CIP segmentations was 5–79 s (median: 10s) on a personal computer with 16GB RAM and 3.40GHz Core i7-4770 CPU.

**Robustness of the segmentation methods:** For the CIP segmentation method, the median  $dsi_{CIP}$  was 99% (Interquartile (IQR) range: 97–100%) and the median  $\delta_{CIP}$  was 14 ml (IQR range: 7–37 ml), while for the manual segmentation method,  $dsi_{manual}$  was 82% (IQR range: 77–85%) and the median  $\delta_{manual}$  was 222 ml (IQR range: 124–461 ml) ([Fig 2](#)). Although both segmentation methods were generally robust (median  $dsi > 80\%$ ), CIP segmentations were significantly more stable than the manual segmentations with  $p_{Wilcoxon} \sim 10^{-16}$  for both robustness measures. [Fig 4A](#) shows a visual example of a patient with more stable nodule contours by the CIP segmentation method than by the manual segmentation method.

**Accuracy of the CIP segmentation:** The Bland-Altman plot in [Fig 3](#) highlights the differences between  $\overline{V_{manual}}$  and  $\overline{V_{CIP}}$  for all nodules. The median value of  $\overline{V_{manual}}$  was 309ml (IQR range: 162–796ml) and  $\overline{V_{CIP}}$  was 477ml (IQR range: 153–1290ml). Nodules segmented by the CIP method were significantly greater in volume than those by manual method ( $p_{Wilcoxon} \sim 10^{-12}$ ). [Fig 4B](#) shows an example where CIP segmentation overestimated the nodule region, including parts of the normal lung.

The agreement between CIP and manual segmentations that was assessed by the median DSI was 60% (IQR range: 46–71%). The relationship between various nodules characteristics and the accuracy of the CIP segmentation (i.e.  $DSI_{Agree}$ ) is shown in [Fig 5](#). Nodule subtlety, margin, texture, lobulation, malignancy, and nodule volume ( $\overline{V_{manual}}$ ) were positively and significantly correlated to the  $DSI_{Agree}$  ( $p_{t-test}$  range:  $1.5 \times 10^{-9}$  -  $6 \times 10^{-3}$ ) ([Fig 5](#)). As the nodule volume increased from 162ml to 796ml, the median  $DSI_{Agree}$  increased from 55% to 78%. The median agreement between CIP and manual segmentations increased from 56% to 70% as the likelihood of the nodule malignancy increased.

An example of a non-solid subtle nodule with poorly defined boundaries is shown in [Fig 4D](#). The accuracy of the CIP segmentation was poor for non-solid or semi-solid nodules, or nodules with poorly defined boundaries and subtle appearances with a median  $DSI_{Agree}$  ranging from 15%–41% ([Table 2](#)). The performance of CIP segmentations for solid nodules with sharp margins and obvious appearances increased to 61% ([Table 2](#)). Nodules that were not marked to be lobulated or spiculated by the radiologists had a median  $DSI_{Agree}$  of 59%. Substantial agreement (median  $DSI_{Agree} > 65\%$ ) between CIP and manual segmentations were found in nodules with marked lobulation and spiculation ([Table 2](#)). Nodule sphericity ( $p_{t-test} = 0.94$ ) and calcification ( $p_{Kruskal-Wallis} = 0.49$ ) were not significantly correlated with  $\overline{V_{manual}}$ . Median  $DSI_{Agree}$  was  $\sim 60\%$  for all nodules regardless of the nodule sphericity and calcification conditions ([Fig 5](#), [Table 2](#)).

While the interior structure of all the other 343 nodules was scored as soft tissue, one nodule was rated to be air ([Fig 4C](#)). For this nodule, the CIP segmentation failed to identify the boundary of the nodule resulting in a  $DSI_{Agree}$  of 1% and was unstable ( $dsi_{CIP} = 42\%$ ) ([Fig 4C](#)). Nodule



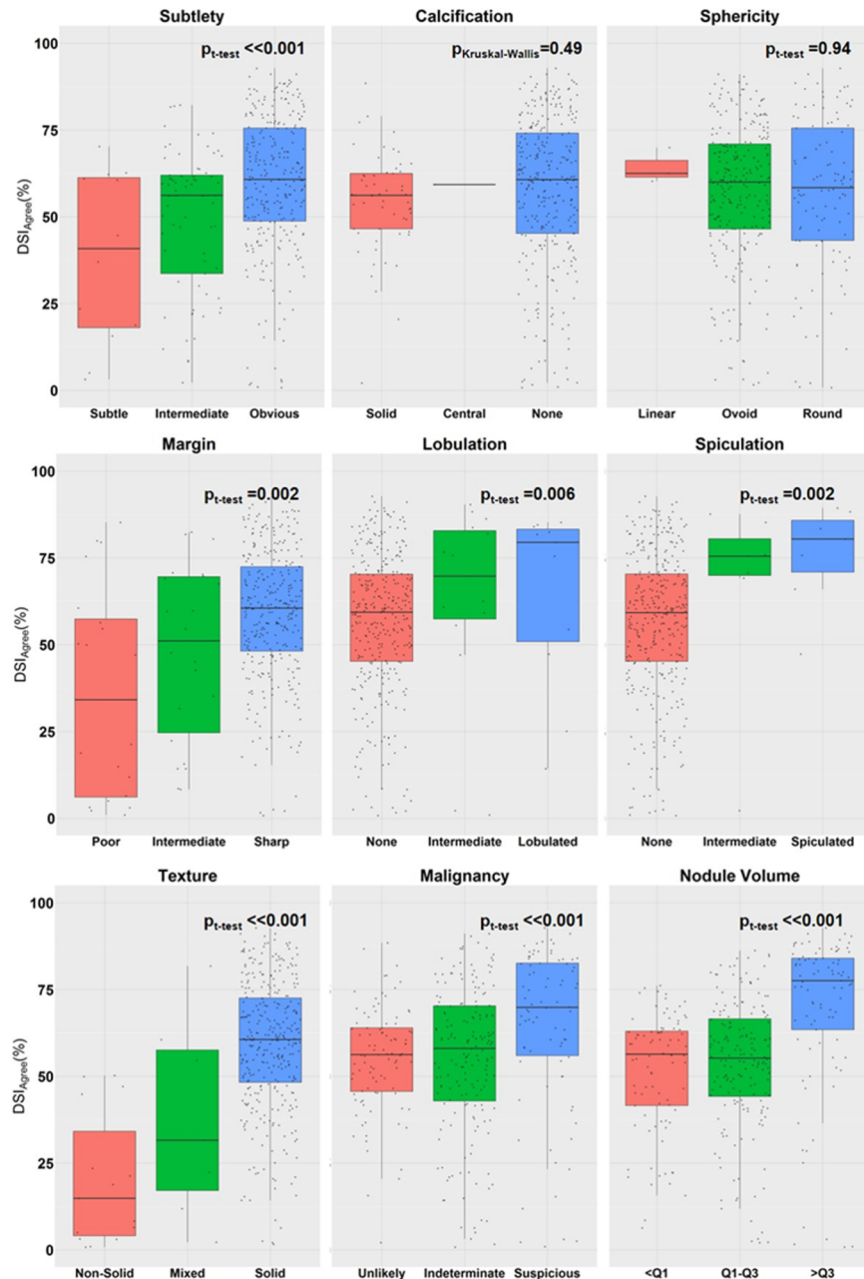

**Fig 5. The relationships between nodule characteristics, nodule volume, and  $DSI_{Agree}$ .** This figure highlights the relationships between nodule characteristics, nodule volume, and  $DSI_{Agree}$ . Calcification: Solid = solid calcification, Central = central calcification, None = no calcification. Lobulation: None = not lobulated. Spiculated: None = not spiculated. Texture: Mixed = Semi-solid nodules. Malignancy: Unlikely = unlikely for cancer, Suspicious = suspicious for cancer. Nodule Volume: Q1 = 162ml, Q1–Q3 = 162ml to 796ml, and Q3 = 796ml; Q = quantile.

<https://doi.org/10.1371/journal.pone.0178944.g005>

malignancy, subtlety, calcification, lobulation, and spiculation were positively and significantly correlated to  $\overline{V}_{manual}$  ( $p_{t-test}$  range =  $6.87 \times 10^{-27}$ – $1.12 \times 10^{-4}$ ).

As image voxel thickness increased from 1 mm to 5 mm, the median  $DSI_{Agree}$  increased from 62% to 79%. However, of the 354 CT images, only two images had a thickness of 5 mm. After excluding these two images from the analysis, the influence of image thickness on the

**Table 2. Distribution of nodule characteristics.** Median  $\sqrt{V_{manual}}$ , median DSI<sub>Agree</sub> and their corresponding interquartile ranges (IQR) for each nodule characteristic.

| Nodule characteristics | Scoring                   | Total (n = 354 nodules) Number (%) | Median DSI <sub>Agree</sub> (IQR) | Median $\sqrt{V_{manual}}$ (IQR) |
|------------------------|---------------------------|------------------------------------|-----------------------------------|----------------------------------|
| Subtlety               | 1 = Extremely subtle      | 5 (1.0%)                           | 19% (5–24%)                       | 207ml (109–380ml)                |
|                        | 2 = Moderately subtle     | 7 (2.0%)                           | 61% (49–62%)                      | 108ml (97–130ml)                 |
|                        | 3 = Fairly subtle         | 69 (20%)                           | 56% (34–62%)                      | 172ml (106–273ml)                |
|                        | 4 = Moderately subtle     | 87 (25%)                           | 52% (42–67%)                      | 209ml (148–414ml)                |
|                        | 5 = Obvious               | 186 (53%)                          | 64% (53–79%)                      | 602ml (289–1415ml)               |
| Calcification          | 1 = Popcorn               | 0 (0%)                             | N/A                               | N/A                              |
|                        | 2 = Laminated             | 0 (0%)                             | N/A                               | N/A                              |
|                        | 3 = Solid                 | 57 (16%)                           | 56% (47–62%)                      | 220ml (124–374ml)                |
|                        | 4 = Non-central           | 0 (%)                              | N/A                               | N/A                              |
|                        | 5 = Central               | 1 (0%)                             | 59% (59–59%)                      | 146ml (146–146ml)                |
|                        | 6 = Absence               | 296 (84%)                          | 61% (45–74%)                      | 370ml (172–884ml)                |
| Sphericity (Roundness) | 1 = Linear                | 0 (0%)                             | N/A                               | N/A                              |
|                        | 2                         | 3 (1.0%)                           | 63% (61–66%)                      | 497ml (403–516ml)                |
|                        | 3 = Ovoid                 | 90 (25%)                           | 60% (48–69%)                      | 290ml (148–529ml)                |
|                        | 4                         | 156 (44%)                          | 60% (44–72%)                      | 301ml (162–805ml)                |
|                        | 5 = Round                 | 105 (30%)                          | 58% (43–76%)                      | 363ml (188–1001ml)               |
| Margin                 | 1 = Poorly                | 3 (1.0%)                           | 6% (5–13%)                        | 803ml (456–908ml)                |
|                        | 2                         | 17 (5.0%)                          | 50% (12–61%)                      | 436ml (212–810ml)                |
|                        | 3                         | 22 (6.0%)                          | 51% (25–70%)                      | 311ml (153–780ml)                |
|                        | 4                         | 81 (23%)                           | 59% (45–70%)                      | 375ml (153–807ml)                |
|                        | 5 = Sharp                 | 231 (65%)                          | 61% (50–74%)                      | 291ml (164–749ml)                |
| Lobulation             | 1 = None                  | 290 (82%)                          | 59% (45–69%)                      | 275ml (150–617ml)                |
|                        | 2                         | 38 (11%)                           | 62% (51–72%)                      | 660ml (318–1930ml)               |
|                        | 3                         | 15 (4.0%)                          | 70% (57–83%)                      | 809ml (609–2986ml)               |
|                        | 4                         | 7 (2.0%)                           | 80% (65–82%)                      | 1357ml (815–1980ml)              |
|                        | 5 = Marked                | 4 (1.0%)                           | 66% (39–84%)                      | 1492ml (283–2801ml)              |
| Spiculation            | 1 = None                  | 312 (88%)                          | 59% (45–70%)                      | 291ml (154–693ml)                |
|                        | 2                         | 28 (8.0%)                          | 61% (54–72%)                      | 483ml (207–785ml)                |
|                        | 3                         | 7 (2.0%)                           | 75% (70–81%)                      | 1542ml (1285–4174ml)             |
|                        | 4                         | 2 (1.0%)                           | 83% (79–86%)                      | 3064ml (2351–3777ml)             |
|                        | 5 = Marked                | 5 (1.0%)                           | 81% (66–83%)                      | 3036ml (984–7489ml)              |
| Texture                | 1 = Non-Solid/GGO         | 13 (4.0%)                          | 8% (3–21%)                        | 380ml (212–810ml)                |
|                        | 2                         | 2 (1.0%)                           | 48% (46–49%)                      | 200ml (149–251ml)                |
|                        | 3 = Part Solid/Mixed      | 7 (2.0%)                           | 32% (17–58%)                      | 711ml (315–815ml)                |
|                        | 4                         | 4 (1.0%)                           | 59% (53–65%)                      | 357ml (264–440ml)                |
|                        | 5 = Solid                 | 328 (93%)                          | 61% (48–73%)                      | 298ml (162–784ml)                |
| Malignancy             | 1 = Highly unlikely       | 69 (20%)                           | 56% (47–63%)                      | 219ml (122–421ml)                |
|                        | 2 = Moderately unlikely   | 27 (8%)                            | 56% (42–67%)                      | 159ml (119–335ml)                |
|                        | 3 = Indeterminate         | 176 (50%)                          | 58% (43–70%)                      | 265ml (153–504ml)                |
|                        | 4 = Moderately suspicious | 49 (14%)                           | 67% (54–80%)                      | 803ml (507–1073ml)               |
|                        | 5 = Highly suspicious     | 33 (9%)                            | 73% (61–85%)                      | 2573ml (1180–4489ml)             |

The intermediate values for Roundness, Margin, Lobulation, Spiculation, and Texture are allowed to use by the radiologists. N/A = not applicable. GGO = Ground Glass Opacity

<https://doi.org/10.1371/journal.pone.0178944.t002>

accuracy of CIP segmentation was insignificant and was nearly negligible (Spearman's correlation coefficient of 0.01 and  $p_{t\text{-test}}$  of 0.82).

According to visual inspection, 13% (47/354) of the nodules did not require any manual adjustment. Minor to moderate manual adjustments were needed for 37% (129/354) of nodules that included non-nodular tissues (e.g. pleura). Substantial manual adjustment were required for 50% (176/354) of the nodules.

## Discussion

Pulmonary nodules can indicate early stage lung cancer or a number of benign conditions. CT-based imaging features have been used to generate imaging biomarkers that predict the malignancy of lung nodules and have demonstrated promising results [19, 20]. Careful delineation of the lung nodule volumes is required for accurate feature extraction to build these imaging biomarkers [15–18]. Most commonly, manual segmentation is the method of choice; however, manual segmentation is not only time consuming, but is also affected by inter-observer variability [21, 22, 24]. Although many automatic and semi-automatic segmentation algorithms for nodule segmentation have been proposed, the widespread use of these algorithms, in the scientific and clinical communities, is hampered by their limited accessibility. In this study, we compared the robustness of manual segmentation and a publically accessible nodule segmentation algorithm, known as CIP segmentation.

CIP segmentation may potentially provide a reliable way to assist physicians in the nodule delineation process by reducing inter-observer variability and the physician workload. The CIP segmentations computed from different seed points from the four radiologists were in excellent agreement, indicating that the CIP method is robust and stable to different segmentation seed points. In comparison, manual segmentation was significantly less stable than CIP segmentation. Comparatively, Velazquez et al (2013) assessed the robustness of manual delineations and a 3D Slicer semi-automatic algorithm, known as GrowCut, in defining the volume of twenty non-small cell lung (NSCLC) tumors [30]. They found that the GrowCut algorithm resulted in significantly smaller regions of uncertainty than manual delineations and concluded that it could be used as a starting point for tumor target delineation in radiotherapy and high-throughput data mining research when manual delineations are not available. The results of our study are consistent with their findings that semiautomatic algorithms (in our case, CIP segmentations) are more stable than manual segmentations in defining lung nodule volumes. Furthermore, CIP segmentation is efficient with a median computation time of only 10s on a personal computer. We anticipate that the computational time of the CIP segmentation algorithm would be significantly reduce on a more powerful computer.

Despite the potential applications of the CIP segmentation algorithm, manual adjustment of the segmentations may be needed, especially for small nodules and nodules with poorly defined boundaries, subtle appearance, and non-solid or part-solid textures. Nodule calcification and sphericity have no impact on the performance of CIP segmentations. The accuracy of CIP segmentations tended to be better when the nodule was solid, more obvious, and with a sharp boundary. Non- and part-solid nodules with a hazy appearance failed to completely obscure parenchymal structures, and have been therefore difficult detect and segment by many segmentation algorithms [27, 28, 38, 39]. Similarly, CIP segmentations also suffer from this limitation, where nodules with subtle appearances may have similar image density as its background that makes the full extent of nodules difficult to define. Therefore, in these cases, the knowledge of experienced radiologists is needed to estimate the extent (or boundary) of the nodules and manually edited the CIP segmentation. The robustness of the CIP segmentation was nearly perfect and significantly better than the manual segmentations (Fig 2). Hence,

the robustness of manual adjustment based on the CIP segmentation is anticipated to be superior to manual segmentation, but not as robust as CIP segmentation alone.

Several segmentation algorithms have been proposed to improve the contours of structures with hazy appearances, such as non- and part-solid nodules, such as the Markov random field theory-based algorithm [40, 41], neural network [42], and a hybrid algorithm that combines threshold-based region growing, connected component analyses and convex hull calculations [28, 39, 43]. Brief descriptions of five example algorithms that have good performance in segmenting GGO and partly solid nodules are shown in Table 3. However, these more sophisticated algorithms are not easily accessible and have not been implemented into open source platforms for widespread use. Incorporating algorithms for defining non- and sub-solid nodules into the 3D Slicer CIP can further improve the performance of the CIP segmentations. Furthermore, although juxtapleural nodules and nodules with vessel attachment are more challenging to segment than the isolated nodules [44, 45], these nodules characteristics were not evaluated and scored by the LIDC radiologists. In the future, it would be interesting to compare the performance of the CIP segmentation in delineating juxtapleural, vessel-attached, and isolated nodules.

CIP segmentations may overestimate nodule region of interest for small nodules. A previous study used eighteen nodules of different sizes, shapes and densities that were embedded into various locations of an anthropomorphic thorax phantom to validate the CIP segmentation algorithm [33]. On average, CIP segmentation overestimated the phantom nodule volume by 35%. In our study, CIP segmentation performed best for large nodules with a difference

**Table 3. Brief descriptions of five algorithms for ground glass opacity (GGO) or partly solid nodule segmentation.**

| Authors                  | Description                                                                                                                                                                                                                                                                                                                                                                                                                   | Number of manually segmented nodules for validation               |
|--------------------------|-------------------------------------------------------------------------------------------------------------------------------------------------------------------------------------------------------------------------------------------------------------------------------------------------------------------------------------------------------------------------------------------------------------------------------|-------------------------------------------------------------------|
| Lassen et al (2015) [28] | Regions of nodules and parenchyma were initially segmented based on the threshold-based region growing algorithm, followed by chest wall removal using the connected component analysis and convex hull calculation. Attached vessels are removed by morphological operations.                                                                                                                                                | 59 LIDC lung nodules                                              |
| Tan et al (2012) [41]    | Marker-controlled watershed were geometric active contours with Markov random field for segmenting nodules                                                                                                                                                                                                                                                                                                                    | 23 LIDC lung and 22 phantom nodules                               |
| Zhu et al (2011) [40]    | Image intensity distributions of the lung nodules were modeled using simple and adaptive data. Gibbs sampler was used to solve the maximum a posteriori probability estimator to identify the best nodule segmentation.                                                                                                                                                                                                       | 41 lung nodules acquired at the Huadong Hospital, Shanghai, China |
| Kubota et al (2010) [38] | Lung parenchyma and nodule-like structures (foreground) were separated using couple competition and diffusion processes. The Euclidean distance transformation was then performed to identify the core of a nodule. Attached structures were removed by a region growing algorithm on the Euclidean distance map. Finally, the segmentation was defined by the overlap region of the nodule's convex hull and the foreground. | 105 LIDC nodules                                                  |
| Zhou et al (2006) [39]   | GGO nodules were first detected using the boosted k-nearest neighbor. The nodules were then segmented based on the nonparametric density estimation of a 3D texture probability map. Eigenvalues analysis of Hessian matrix was used to remove tube like vessel structures.                                                                                                                                                   | 10 clinical nodules                                               |

<https://doi.org/10.1371/journal.pone.0178944.t003>

between segmented and phantom nodule volumes <15%. In patients, larger differences were found between the CIP and manually segmented nodule volumes ( $\overline{V}_{CIP} = 477\text{ml}$  vs  $\overline{V}_{manual} = 309\text{ml}$ ). This may be due to the fact that patient nodules (e.g. vessel-attached and juxtapleural nodules) were more variable than those embedded in the phantom. CIP segmentations performed better for nodules with larger volumes ( $\overline{V}_{manual}$ ) and a higher likelihood of being malignant. Nodules that are larger in size (e.g. >4mm nodule diameter in the National Lung Screening Trial in the United States [5]) are generally considered to be more likely to be malignant. Moreover, the appearance of a large nodule is less subtle and more obvious. As expected, in our study, nodule malignancy and subtlety were positively correlated with nodule volumes. According to the LIDC publications and documentations, it is unclear whether all segmentations were performed by the same or different radiologists [23, 42, 46]. However, we found that the nodule volumes segmented by different LIDC radiologists were consistent and in excellent agreement (Fig 1). Thus, our comparison between CIP- and manual segmentations would be mildly influenced by the inter-radiologist variability even if the nodules were not defined by the same radiologist. Substantial agreement between CIP and manual segmentations were found for nodule volumes >796ml. Moreover, larger nodule volumes may be more likely to be lobulated and spiculated due to the significant correlation between these characteristics and the nodule volume. This may explain why the CIP segmentation method performed better for nodules with marked lobulation and spiculation. We observed that nodule volumes computed from CIP segmentations were significantly greater than those computed from manual segmentation. For nodules with smaller size, CIP segmentations often include adjacent tissues, such as normal lung and blood vessels. Furthermore, small nodules were not only more likely to have subtle appearances and thus, were difficult to detect, but could also be easily overestimated by CIP segmentations. Therefore, manual adjustments may be needed to correct for the overestimation of the small nodules in the CIP segmentations.

An emerging field that converts medical images into high dimensional mineable data is called radiomics [47]. In addition to differentiating between benign and malignant nodules, radiomic features of lung lesions could also be used to predict clinical outcomes and treatment response [1, 2, 48]. Several lung screening trials using CT images have been launched in Asia [49–51], Europe [52–54], and the United States [5, 55, 56] to identify patients with early lung cancer. Due to the easy accessibility of the CIP segmentation algorithm, this method may be useful for nodule delineation in these lung trial datasets that consist of a large number of patients. This could subsequently expedite the high-throughput extraction of imaging features for radiomic analysis for nodule classification and patient outcomes for precision medicine, especially for patients with large nodules. Future studies will need to investigate how inaccurate CIP segmented nodule volumes influence the predictive power of radiomic features.

The CIP segmentation algorithm relies on several parameters for the generation of the feature maps that were experimentally set up to default values. Further improvements in the segmentation result may be expected by a careful selection of those parameters. Our experience was that the default parameters provided in CIP work well on average but specific nodule characteristics would benefit for tailored parameters selection.

## Conclusion

A semi-automatic segmentation algorithm implemented under the 3D Slicer Chest Imaging Platform (CIP) may be useful for assisting physicians in nodule volume delineation. CIP segmentations can potentially reduce the physician workload in 13% of the nodules and inter-observer variability due to its computational efficiency and superior stability compared to manual segmentation. Due to the public accessibility of the CIP segmentation algorithm, it can

be employed to initiate nodule segmentation for large datasets, such as lung screening trials, thereby facilitating efficient nodule classification and high-throughput data mining research. However, CIP segmentations should be used with care and manual adjustment of the segmentations may be needed for the majority (87%) of the nodules, including small nodules, and nodules with subtle appearances, poorly defined boundaries and non- and part-solid texture. Although manual adjustment is needed for many cases, CIP segmentation provides a preliminary contour for physicians as a starting point

## Supporting information

**S1 File. Examples of the segmentation artifact and the distribution of radiologist rating for each nodule characteristics.**

(DOCX)

## Acknowledgments

The authors would like to acknowledge support from the National Institute of Health (Award Number U01CA190234 and U24CA194354) and research seed funding grant from the American Association of Physicists in Medicine. The Chest Imaging Platform (CIP) is supported by the National Institute of Health award number 1R01HL116931. Furthermore, we would like to thank Dr. Elizabeth Huynh for editorial assistance.

## Author Contributions

**Conceptualization:** SSFY CP HJWLA.

**Data curation:** DB SP SSFY CP HJWLA.

**Formal analysis:** SSFY CP JK HJWLA.

**Funding acquisition:** HJWLA RSJE.

**Investigation:** SSFY CP DB JK.

**Methodology:** SSFY CP RSJE SP JK HJWLA.

**Project administration:** SSFY CP DB SP HJWLA.

**Resources:** DB RSJE SP.

**Software:** DB RSJE SP.

**Supervision:** DB SP HJWLA.

**Validation:** SSFY CP JK HJWLA.

**Visualization:** SSFY CP JK.

**Writing – original draft:** SSFY CP HJWLA.

**Writing – review & editing:** SSFY CP DB RSJE SP JK HJWLA.

## References

1. Aerts HJWL, Velazquez ER, Leijenaar RTH, Parmar C, Grossmann P, Carvalho S, et al. Decoding tumour phenotype by noninvasive imaging using a quantitative radiomics approach. *Nat Commun.* 2014; 5:4006. <https://doi.org/10.1038/ncomms5006> PMID: 24892406

2. Coroller TP, Agrawal V, Narayan V, Hou Y, Grossmann P, Lee SW, et al. Radiomic phenotype features predict pathological response in non-small cell lung cancer. *Radiotherapy and Oncology*. 2016; 119(3):480–6. <https://doi.org/10.1016/j.radonc.2016.04.004>. <https://doi.org/10.1016/j.radonc.2016.04.004> PMID: 27085484
3. Torre LA, Bray F, Siegel RL, Ferlay J, Lortet-Tieulent J, Jemal A. Global cancer statistics, 2012. *CA: A Cancer Journal for Clinicians*. 2015; 65(2):87–108. <https://doi.org/10.3322/caac.21262> PMID: 25651787
4. Association AL. Lung Cancer Fact Sheet. <http://www.lung.org/>. 2016.
5. Team TNLSTR. Reduced Lung-Cancer Mortality with Low-Dose Computed Tomographic Screening. *New England Journal of Medicine*. 2011; 365(5):395–409. doi: [10.1056/NEJMoa1102873](https://doi.org/10.1056/NEJMoa1102873). PMID: 21714641.
6. World Health Organization. WHO methods and data sources for global burden of disease estimates 2000–2011. World Health Organization. 2013. [http://www.who.int/healthinfo/statistics/GlobalDALYmethods\\_2000\\_2011.pdf?ua=1](http://www.who.int/healthinfo/statistics/GlobalDALYmethods_2000_2011.pdf?ua=1). Accessed 13 Aug 2015.
7. Armato SG, Giger ML, Moran CJ, Blackburn JT, Doi K, MacMahon H. Computerized Detection of Pulmonary Nodules on CT Scans. *RadioGraphics*. 1999; 19(5):1303–11. <https://doi.org/10.1148/radiographics.19.5.g99se181303> PMID: 10489181.
8. Erasmus JJ, Connolly JE, McAdams HP, Roggli VL. Solitary Pulmonary Nodules: Part I. Morphologic Evaluation for Differentiation of Benign and Malignant Lesions. *RadioGraphics*. 2000; 20(1):43–58. <https://doi.org/10.1148/radiographics.20.1.g00ja0343> PMID: 10682770.
9. McNitt-Gray MF, Wyckoff N, Sayre JW, Goldin JG, Aberle DR. The effects of co-occurrence matrix based texture parameters on the classification of solitary pulmonary nodules imaged on computed tomography. *Computerized Medical Imaging and Graphics*. 1999; 23(6):339–48. [https://doi.org/10.1016/S0895-6111\(99\)00033-6](https://doi.org/10.1016/S0895-6111(99)00033-6). PMID: 10634146
10. Shah SK, McNitt-Gray MF, Rogers SR, Goldin JG, Suh RD, Sayre JW, et al. Computer Aided Characterization of the Solitary Pulmonary Nodule Using Volumetric and Contrast Enhancement Features1. *Academic Radiology*. 2005; 12(10):1310–9. <https://doi.org/10.1016/j.acra.2005.06.005>. <https://doi.org/10.1016/j.acra.2005.06.005> PMID: 16179208
11. Li F, Sone S, Abe H, MacMahon H, Doi K. Malignant versus Benign Nodules at CT Screening for Lung Cancer: Comparison of Thin-Section CT Findings. *Radiology*. 2004; 233(3):793–8. <https://doi.org/10.1148/radiol.2333031018> PMID: 15498895.
12. Revel M-P, Merlin A, Peyrard S, Triki R, Couchon S, Chatellier G, et al. Software Volumetric Evaluation of Doubling Times for Differentiating Benign Versus Malignant Pulmonary Nodules. *American Journal of Roentgenology*. 2006; 187(1):135–42. <https://doi.org/10.2214/AJR.05.1228> PMID: 16794167
13. Yankelevitz DF, Reeves AP, Kostis WJ, Zhao B, Henschke CI. Small Pulmonary Nodules: Volumetrically Determined Growth Rates Based on CT Evaluation. *Radiology*. 2000; 217(1):251–6. <https://doi.org/10.1148/radiology.217.1.r00oc33251> PMID: 11012453.
14. Lee YH, Kim DW, In HS, Park JS, Kim SH, Eom JW, et al. Differentiation between Benign and Malignant Solid Thyroid Nodules Using an US Classification System. *Korean Journal of Radiology*. 2011; 12(5):559–67. doi: [10.3348/kjr.2011.12.5.559](https://doi.org/10.3348/kjr.2011.12.5.559). PMID: 21927557
15. Farag A, Ali A, Graham J, Elhabian S, Farag A, Falk R. Feature-Based Lung Nodule Classification. In: Bebis G, Boyle R, Parvin B, Koracin D, Chung R, Hammound R, et al., editors. *Advances in Visual Computing: 6th International Symposium, ISVC 2010, Las Vegas, NV, USA, November 29–December 1, 2010, Proceedings, Part III*. Berlin, Heidelberg: Springer Berlin Heidelberg; 2010. p. 79–88.
16. Armato SG, Altman MB, Wilkie J, Sone S, Li F, Doi K, et al. Automated lung nodule classification following automated nodule detection on CT: A serial approach. *Medical Physics*. 2003; 30(6):1188–97. <https://doi.org/10.1118/1.1573210>. <https://doi.org/10.1118/1.1573210> PMID: 12852543
17. Dhara AK, Mukhopadhyay S, Dutta A, Garg M, Khandelwal N. A Combination of Shape and Texture Features for Classification of Pulmonary Nodules in Lung CT Images. *Journal of Digital Imaging*. 2016; 29(4):466–75. <https://doi.org/10.1007/s10278-015-9857-6> PMID: 26738871
18. Madero Orozco H, Vergara Villegas OO, Cruz Sánchez VG, Ochoa Domínguez HdJ, Nandayapa Alfaro MdJ. Automated system for lung nodules classification based on wavelet feature descriptor and support vector machine. *BioMedical Engineering OnLine*. 2015; 14(1):1–20. <https://doi.org/10.1186/s12938-015-0003-y> PMID: 25888834
19. Hawkins S, Wang H, Liu Y, Garcia A, Stringfield O, Krewer H, et al. Predicting malignant nodules from screening CTs. *Journal of Thoracic Oncology*. 2016. <https://doi.org/10.1016/j.jtho.2016.07.002>.
20. Ma J, Wang Q, Ren Y, Hu H, Zhao J, editors. *Automatic lung nodule classification with radiomics approach2016*.

21. Bd Hoop, Gietema H, Vorst Svd, Murphy K, Klaveren Rjv, Prokop M. Pulmonary Ground-Glass Nodules: Increase in Mass as an Early Indicator of Growth. *Radiology*. 2010; 255(1):199–206. <https://doi.org/10.1148/radiol.09090571> PMID: 20123896.
22. Leader JK, Warfel TE, Fuhrman CR, Golla SK, Weissfeld JL, Avila RS, et al. Pulmonary Nodule Detection with Low-Dose CT of the Lung: Agreement Among Radiologists. *American Journal of Roentgenology*. 2005; 185(4):973–8. <https://doi.org/10.2214/AJR.04.1225> PMID: 16177418
23. Armato SG, McLennan G, Bidaut L, McNitt-Gray MF, Meyer CR, Reeves AP, et al. The Lung Image Database Consortium (LIDC) and Image Database Resource Initiative (IDRI): A Completed Reference Database of Lung Nodules on CT Scans. *Medical Physics*. 2011; 38(2):915–31. <https://doi.org/10.1118/1.3528204> PMID: 21452728
24. Steenbakkens RJHM, Duppen JC, Fitton I, Deurloo KEI, Zijp LJ, Comans EFI, et al. Reduction of observer variation using matched CT-PET for lung cancer delineation: A three-dimensional analysis. *International Journal of Radiation Oncology\*Biophysics\*Physics*. 2006; 64(2):435–48. <https://doi.org/10.1016/j.ijrobp.2005.06.034>.
25. Goo JM, Tongdee T, Tongdee R, Yeo K, Hildebolt CF, Bae KT. Volumetric Measurement of Synthetic Lung Nodules with Multi-Detector Row CT: Effect of Various Image Reconstruction Parameters and Segmentation Thresholds on Measurement Accuracy. *Radiology*. 2005; 235(3):850–6. <https://doi.org/10.1148/radiol.2353040737> PMID: 15914478.
26. Dehmeshki J, Amin H, Valdivieso M, Ye X. Segmentation of Pulmonary Nodules in Thoracic CT Scans: A Region Growing Approach. *IEEE Transactions on Medical Imaging*. 2008; 27(4):467–80. <https://doi.org/10.1109/TMI.2007.907555> PMID: 18390344
27. Tao Y, Lu L, Dewan M, Chen AY, Corso J, Xuan J, et al. Multi-level Ground Glass Nodule Detection and Segmentation in CT Lung Images. In: Yang G-Z, Hawkes D, Rueckert D, Noble A, Taylor C, editors. *Medical Image Computing and Computer-Assisted Intervention—MICCAI 2009: 12th International Conference, London, UK, September 20–24, 2009, Proceedings, Part II*. Berlin, Heidelberg: Springer Berlin Heidelberg; 2009. p. 715–23.
28. Lassen BC, Jacobs C, Kuhnigk JM, Ginneken Bv, Rikxoort EMv. Robust semi-automatic segmentation of pulmonary subsolid nodules in chest computed tomography scans. *Physics in Medicine and Biology*. 2015; 60(3):1307. <https://doi.org/10.1088/0031-9155/60/3/1307> PMID: 25591989
29. Fedorov A, Beichel R, Kalpathy-Cramer J, Finet J, Fillion-Robin J-C, Pujol S, et al. 3D Slicer as an Image Computing Platform for the Quantitative Imaging Network. *Magnetic resonance imaging*. 2012; 30(9):1323–41. doi: [10.1016/j.mri.2012.05.001](https://doi.org/10.1016/j.mri.2012.05.001). PMID: 22770690
30. Velazquez ER, Parmar C, Jermoumi M, Mak RH, van Baardwijk A, Fennessy FM, et al. Volumetric CT-based segmentation of NSCLC using 3D-Slicer. *Sci Rep*. 2013; 3:3529. <https://doi.org/10.1038/srep03529> <http://www.nature.com/srep/2013/131218/srep03529/abs/srep03529.html#supplementary-information>. PMID: 24346241
31. Parmar C, Rios Velazquez E, Leijenaar R, Jermoumi M, Carvalho S, Mak RH, et al. Robust Radiomics Feature Quantification Using Semiautomatic Volumetric Segmentation. *PLoS ONE*. 2014; 9(7): e102107. doi: [10.1371/journal.pone.0102107](https://doi.org/10.1371/journal.pone.0102107). PMID: 25025374
32. Kuhnigk JM, Dicken V, Bornemann L, Bakai A, Wormanns D, Krass S, et al. Morphological segmentation and partial volume analysis for volumetry of solid pulmonary lesions in thoracic CT scans. *IEEE Transactions on Medical Imaging*. 2006; 25(4):417–34. <https://doi.org/10.1109/TMI.2006.871547> PMID: 16608058
33. Krishnan K, Ibanez L, Turner WD, Jomier J, Avila RS. An open-source toolkit for the volumetric measurement of CT lung lesions. *Optics Express*. 2010; 18(14):15256–66. <https://doi.org/10.1364/OE.18.015256> PMID: 20640012
34. Raul San Jose E, James CR, Rola H, Jorge O, Alejandro AD, George RW. Chest Imaging Platform: An Open-Source Library and Workstation for Quantitative Chest Imaging. C66 LUNG IMAGING II: NEW PROBES AND EMERGING TECHNOLOGIES. *American Thoracic Society International Conference Abstracts: American Thoracic Society*; 2015. p. A4975-A.
35. Caselles V, Kimmel R, Sapiro G. Geodesic Active Contours. *International Journal of Computer Vision*. 1997; 22(1):61–79. <https://doi.org/10.1023/a:1007979827043>
36. Ross JC, Estépar RSJ, Díaz A, Westin C-F, Kikinis R, Silverman EK, et al. Lung Extraction, Lobe Segmentation and Hierarchical Region Assessment for Quantitative Analysis on High Resolution Computed Tomography Images. *Medical image computing and computer-assisted intervention: MICCAI International Conference on Medical Image Computing and Computer-Assisted Intervention*. 2009; 12(Pt 2):690–8. PubMed PMID: PMC3061233.
37. Sato Y, Nakajima S, Shiraga N, Atsumi H, Yoshida S, Koller T, et al. Three-dimensional multi-scale line filter for segmentation and visualization of curvilinear structures in medical images. *Medical Image Analysis*. 1998; 2(2):143–68. [https://doi.org/10.1016/S1361-8415\(98\)80009-1](https://doi.org/10.1016/S1361-8415(98)80009-1). PMID: 10646760



38. Kubota T, Jerebko AK, Dewan M, Salganicoff M, Krishnan A. Segmentation of pulmonary nodules of various densities with morphological approaches and convexity models. *Medical Image Analysis*. 2011; 15(1):133–54. <https://doi.org/10.1016/j.media.2010.08.005>. <https://doi.org/10.1016/j.media.2010.08.005> PMID: 20863740
39. Zhou J, Chang S, Metaxas DN, Zhao B, Ginsberg MS, Schwartz LH, editors. An Automatic Method for Ground Glass Opacity Nodule Detection and Segmentation from CT Studies. *Engineering in Medicine and Biology Society, 2006 EMBS '06 28th Annual International Conference of the IEEE*; 2006 Aug. 30 2006–Sept. 3 2006.
40. Zhu Y, Tan Y, Hua Y, Zhang G, Zhang J. Automatic Segmentation of Ground-Glass Opacities in Lung CT Images by Using Markov Random Field-Based Algorithms. *Journal of Digital Imaging*. 2012; 25(3):409–22. doi: 10.1007/s10278-011-9435-5. PMID: 22089834
41. Tan Y, Schwartz LH, Zhao B. Segmentation of lung lesions on CT scans using watershed, active contours, and Markov random field. *Medical Physics*. 2013; 40(4):043502. doi: 10.1118/1.4793409. PMID: 23556926
42. Messay T, Hardie RC, Tuinstra TR. Segmentation of pulmonary nodules in computed tomography using a regression neural network approach and its application to the Lung Image Database Consortium and Image Database Resource Initiative dataset. *Medical Image Analysis*. 2015; 22(1):48–62. <https://doi.org/10.1016/j.media.2015.02.002>. <https://doi.org/10.1016/j.media.2015.02.002> PMID: 25791434
43. Tachibana R, Kido S, editors. Automatic segmentation of pulmonary nodules on CT images by use of NCI lung image database consortium. *Medical Imaging 2006: Image Processing*; 2006: Proc. SPIE
44. Jirapatnakul CA, Mulman DY, Yankellevitz FD, Henschke IC. Segmentation of Juxtapleural Pulmonary Nodules Using a Robust Surface Estimate. *International Journal of Biomedical Imaging*. 2011; 2011. <https://doi.org/10.1155/2011/632195> PMID: 22114585
45. Chen K, Li B, Tian L-f, Zhu W-b, Bao Y-h. Vessel attachment nodule segmentation using integrated active contour model based on fuzzy speed function and shape–intensity joint Bhattacharya distance. *Signal Processing*. 2014; 103:273–84. <https://doi.org/10.1016/j.sigpro.2013.09.009>.
46. The Cancer Imaging Archive (TCIA) Public Access. The Lung Image Database Consortium image collection (LIDC-IDRI) <https://wiki.cancerimagingarchive.net/display/Public/LIDC-IDRI> Accessed 30 Dec 2016.
47. Yip SFS, Aerts JWLH. Applications and limitations of radiomics. *Physics in Medicine and Biology*. 2016; 61(13):R150. <https://doi.org/10.1088/0031-9155/61/13/R150> PMID: 27269645
48. Coroller TP, Grossmann P, Hou Y, Rios Velazquez E, Leijenaar RTH, Hermann G, et al. CT-based radiomic signature predicts distant metastasis in lung adenocarcinoma. *Radiotherapy and Oncology*. 2015; 114(3):345–50. <https://doi.org/10.1016/j.radonc.2015.02.015>. <https://doi.org/10.1016/j.radonc.2015.02.015> PMID: 25746350
49. Sone S, Takashima S, Li F, Yang Z, Honda T, Maruyama Y, et al. Mass screening for lung cancer with mobile spiral computed tomography scanner. *The Lancet*. 1998; 351(9111):1242–5. [https://doi.org/10.1016/S0140-6736\(97\)08229-9](https://doi.org/10.1016/S0140-6736(97)08229-9).
50. Nawa T, Nakagawa T, Kusano S, Kawasaki Y, Sugawara Y, Nakata H. Lung Cancer Screening Using Low-Dose Spiral CT: Results of Baseline and 1-Year Follow-up Studies. *Chest*. 2002; 122(1):15–20. <https://doi.org/10.1378/chest.122.1.15>. PMID: 12114333
51. Chong S, Lee KS, Chung MJ, Kim TS, Kim H, Kwon OJ, et al. Lung Cancer Screening with Low-Dose Helical CT in Korea: Experiences at the Samsung Medical Center. *J Korean Med Sci*. 2005; 20(3):402–8. <https://doi.org/10.3346/jkms.2005.20.3.402> PMID: 15953860
52. Ashraf H, Tønnesen P, Holst Pedersen J, Dirksen A, Thorsen H, Døssing M. Effect of CT screening on smoking habits at 1-year follow-up in the Danish Lung Cancer Screening Trial (DLCST). *Thorax*. 2009; 64(5):388–92. <https://doi.org/10.1136/thx.2008.102475> PMID: 19052048
53. Lopes Pegna A, Picozzi G, Mascalchi M, Maria Carozzi F, Carrozzi L, Comin C, et al. Design, recruitment and baseline results of the ITALUNG trial for lung cancer screening with low-dose CT. *Lung Cancer*. 2009; 64(1):34–40. <https://doi.org/10.1016/j.lungcan.2008.07.003>. <https://doi.org/10.1016/j.lungcan.2008.07.003> PMID: 18723240
54. Pedersen JH, Ashraf H, Dirksen A, Bach K, Hansen H, Toennesen P, et al. The Danish Randomized Lung Cancer CT Screening Trial—Overall Design and Results of the Prevalence Round. *Journal of Thoracic Oncology*. 2009; 4(5):608–14. <https://doi.org/10.1097/JTO.0b013e3181a0d98f>. <https://doi.org/10.1097/JTO.0b013e3181a0d98f> PMID: 19357536
55. Gohagan J, Marcus P, Fagerstrom R, Pinsky P, Kramer B, Prorok P. Baseline Findings of a Randomized Feasibility Trial of Lung Cancer Screening With Spiral CT Scan vs Chest Radiograph: The Lung Screening Study of the National Cancer Institute. *Chest*. 2004; 126(1):114–21. <https://doi.org/10.1378/chest.126.1.114>. <https://doi.org/10.1378/chest.126.1.114> PMID: 15249451
56. Team NLSTR. The National Lung Screening Trial: Overview and Study Design. *Radiology*. 2011; 258(1):243–53. <https://doi.org/10.1148/radiol.10091808> PMID: 21045183.
